# Supplementary material for: Prevalence, Persistence, and Factors Associated with SARS-CoV-2 IgG Seropositivity in a Large Cohort of Healthcare Workers in a Tertiary Care University Hospital in Northern Italy
Source: MDPI journal article supplement (doi:10.3390/v13061064), 2021-06-03
Supplement: s1 [file s1]

**Table S1.** – Prevalence of seropositive by demographic and occupational characteristics and by type of contact with persons with a diagnosis or suspected symptoms of COVID-19 among UNITO workers.

|                                    | All participants<br><i>N</i> (%) | Seropositive<br>% (95%CI) |
|------------------------------------|----------------------------------|---------------------------|
| Overall                            | <i>N</i> =1185                   | 3.3 (2.4-4.5)             |
| Age (median, IQR)                  | 50.5 (44.1-56.5)                 |                           |
| <b>Age class</b>                   |                                  |                           |
| ≤29 yrs                            | 10 (0.8)                         | -                         |
| 30-39 yrs                          | 146 (12.3)                       | 1.4 (0.2-4.9)             |
| 40-49 yrs                          | 413 (34.9)                       | 3.6 (2.0-5.9)             |
| 50-59 yrs                          | 446 (37.6)                       | 2.9 (1.6-4.9)             |
| ≥ 60 yrs                           | 170 (14.4)                       | 5.3 (2.4-9.8)             |
| <b>Gender</b>                      |                                  |                           |
| Female                             | 757 (63.9)                       | 3.3 (2.2-4.8)             |
| Male                               | 428 (36.1)                       | 3.3 (1.8-5.4)             |
| <b>Job profile:</b>                |                                  |                           |
| Teaching and Research Staff        | 544 (45.9)                       | 2.6 (1.4-4.3)             |
| Technical and Administrative Staff | 641 (54.1)                       | 3.9 (2.5-5.7)             |
| <b>Smoking habit</b>               |                                  |                           |
| Never smokers                      | 842 (71.1)                       | 3.1 (2.0-4.5)             |
| Former smokers                     | 95 (8.0)                         | 4.2 (1.2-10.4)            |
| Current smokers                    | 146 (12.3)                       | 4.1 (1.5-8.7)             |
| Not reported                       | 102 (8.6)                        | 2.9 (0.6-8.4)             |
| <b>BMI</b>                         |                                  |                           |
| Underweight (BMI <18.5)            | 44 (3.7)                         | 2.3 (0.1-12.0)            |
| Normal weight (BMI 18.5-25)        | 728 (61.4)                       | 3.6 (2.3-5.2)             |
| Overweight (BMI 25-30)             | 298 (25.2)                       | 2.7 (1.2-5.2)             |
| Obese (BMI >30)                    | 95 (8.0)                         | 3.2 (0.7-8.9)             |
| Not reported                       | 20 (1.7)                         | 5.0 (0.1-24.9)            |
| <b>Contacts at work</b>            |                                  |                           |
| No                                 | 1151 (97.1)                      | 3.2 (2.3-4.4)             |
| Yes                                | 33 (2.7)                         | 6.1 (0.7-20.2)            |
| Not reported                       | 1 (0.1)                          | -                         |
| <b>Household contacts</b>          |                                  |                           |
| No                                 | 1139 (96.1)                      | 2.6 (1.8-3.7)             |
| Yes                                | 45 (3.8)                         | 20.0 (9.6-34.6)           |
| Not reported                       | 1 (0.1)                          | -                         |
| <b>Other contacts</b>              |                                  |                           |
| No                                 | 1153 (97.3)                      | 3.4 (2.4-4.6)             |
| Yes                                | 31 (2.6)                         | -                         |
| Not reported                       | 1 (0.1)                          | -                         |

**Table S2.** Multivariable logistic regression model (ORs and 95% CI) for predictors of seropositivity among workers of UNITO.

|                                    | OR          | 95%CI            | p-values     |
|------------------------------------|-------------|------------------|--------------|
| <b>Age</b>                         | <b>1.03</b> | <b>0.98-1.07</b> | <b>0.208</b> |
| <b>Gender</b>                      |             |                  |              |
| Female                             | 1.00        |                  |              |
| Male                               | 1.19        | 0.56-2.54        | 0.652        |
| <b>BMI</b>                         |             |                  |              |
| Underweight (BMI <18.5)            | 1.00        |                  |              |
| Normal weight (BMI 18.5-25)        | 0.86        | 0.11-6.76        | 0.884        |
| Overweight (BMI 25-30)             | 0.64        | 0.27-1.52        | 0.313        |
| Obese (BMI >30)                    | 0.57        | 0.13-2.58        | 0.465        |
| <b>Smoking habit</b>               |             |                  |              |
| Never smokers                      | 1.00        |                  |              |
| Former smokers                     | 1.22        | 0.40-3.79        | 0.727        |
| Current smokers                    | 0.88        | 0.32-2.45        | 0.810        |
| Not reported                       | 0.55        | 0.12-2.49        | 0.441        |
| <b>At least one comorbidities*</b> |             |                  |              |
| No                                 | 1.00        |                  |              |
| Yes                                | 1.87        | 0.85-4.15        | 0.122        |
| <b>Flu vaccination (2019-20)</b>   |             |                  |              |

|                                                |       |            |        |
|------------------------------------------------|-------|------------|--------|
| No                                             | 1.00  |            |        |
| Yes                                            | 0.70  | 0.24-2.04  | 0.515  |
| <b>Intake of therapeutic drugs (regularly)</b> |       |            |        |
| No                                             | 1.00  |            |        |
| Yes                                            | 1.22  | 0.54-2.76  | 0.637  |
| <b>Job profile:</b>                            |       |            |        |
| Teaching and Research Staff                    | 1.00  |            |        |
| Technical and Administrative Staff             | 1.60  | 0.77-3.34  | 0.209  |
| <b>Contacts at work</b>                        |       |            |        |
| No                                             | 1.00  |            |        |
| Yes                                            | 1.24  | 0.23-6.71  | 0.799  |
| <b>Household contacts</b>                      |       |            |        |
| No                                             | 1.00  |            |        |
| Yes                                            | 11.89 | 4.79-29.46 | <0.001 |

\*Comorbidities: cardiovascular diseases, diabetes, allergic rhinitis, immune deficits, chronic respiratory diseases, renal diseases, hypertension, auto-immune diseases, neurological diseases, neoplasms.

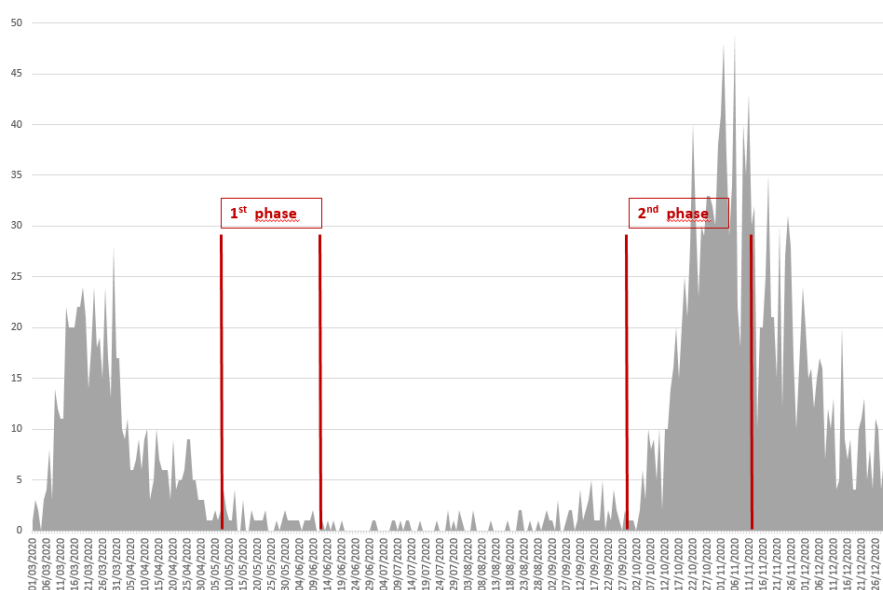

**Figure S1.** Number of daily access (emergency room visits and/or hospitalizations) to CSS – city of Turin, of COVID-19 patients during 2020. Vertical lines identify the periods of the two seroprevalence surveys on CSS workers.
